# Supplementary material for: Global analysis of B cell selection using an immunoglobulin light chain–mediated model of autoreactivity
Source: PubMed Central journal article supplement — J Exp Med. 2013 Jan 14;210(1):125–42. doi: 10.1084/jem.20120525 (PMC3549719; doi:10.1084/jem.20120525), 2013-01-14
Supplement: supp_jem.20120525_JEM_20120525_sm.pdf [file supp_jem.20120525_JEM_20120525_sm.pdf]

SUPPLEMENTAL MATERIAL

Andrews et al., <http://www.jem.org/cgi/content/full/jem.20120525/DC1>

A Bone Marrow

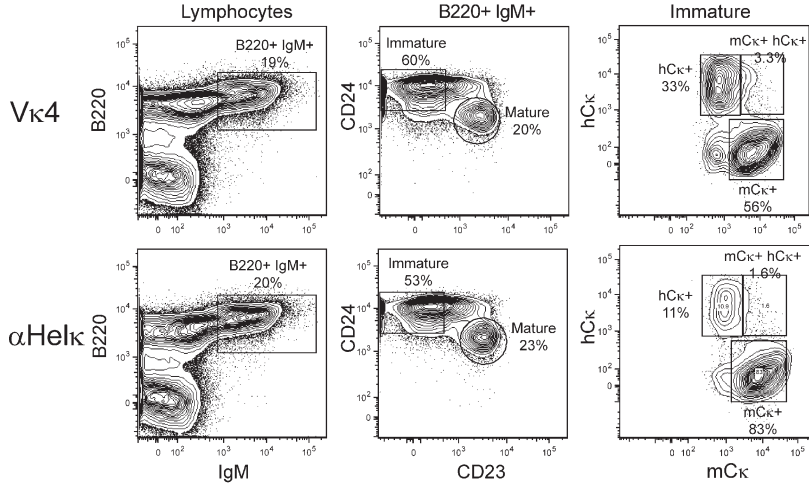

B Spleen

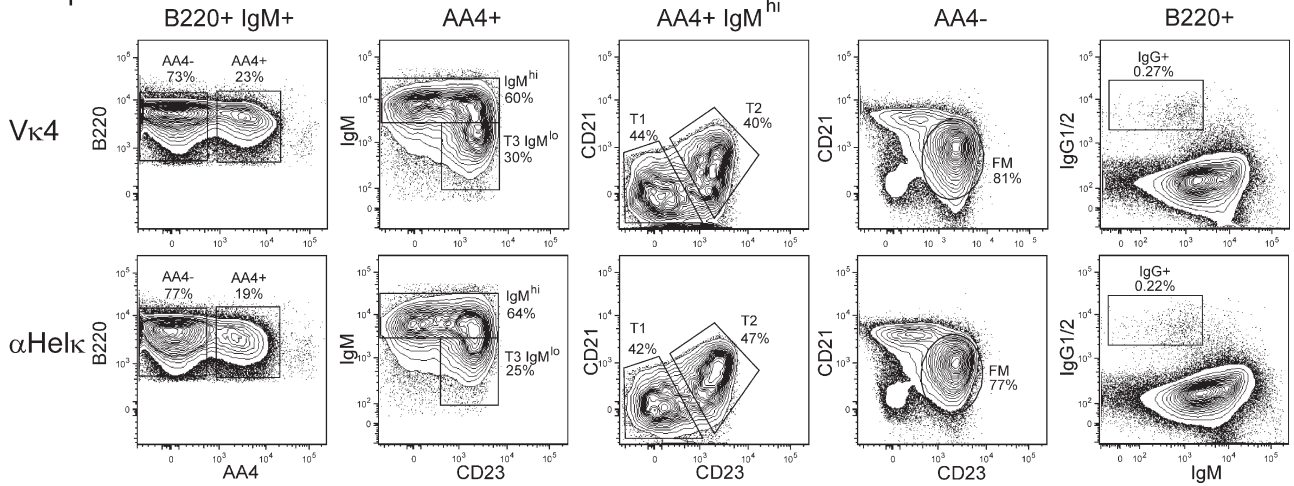

**Figure S1. B cell developmental subsets in LC transgenic mice.** (A and B) Representative flow cytometry plots demonstrating how BM B cell (A) subsets or splenic B cell (B) populations were gated in LC transgenic mice as indicated.

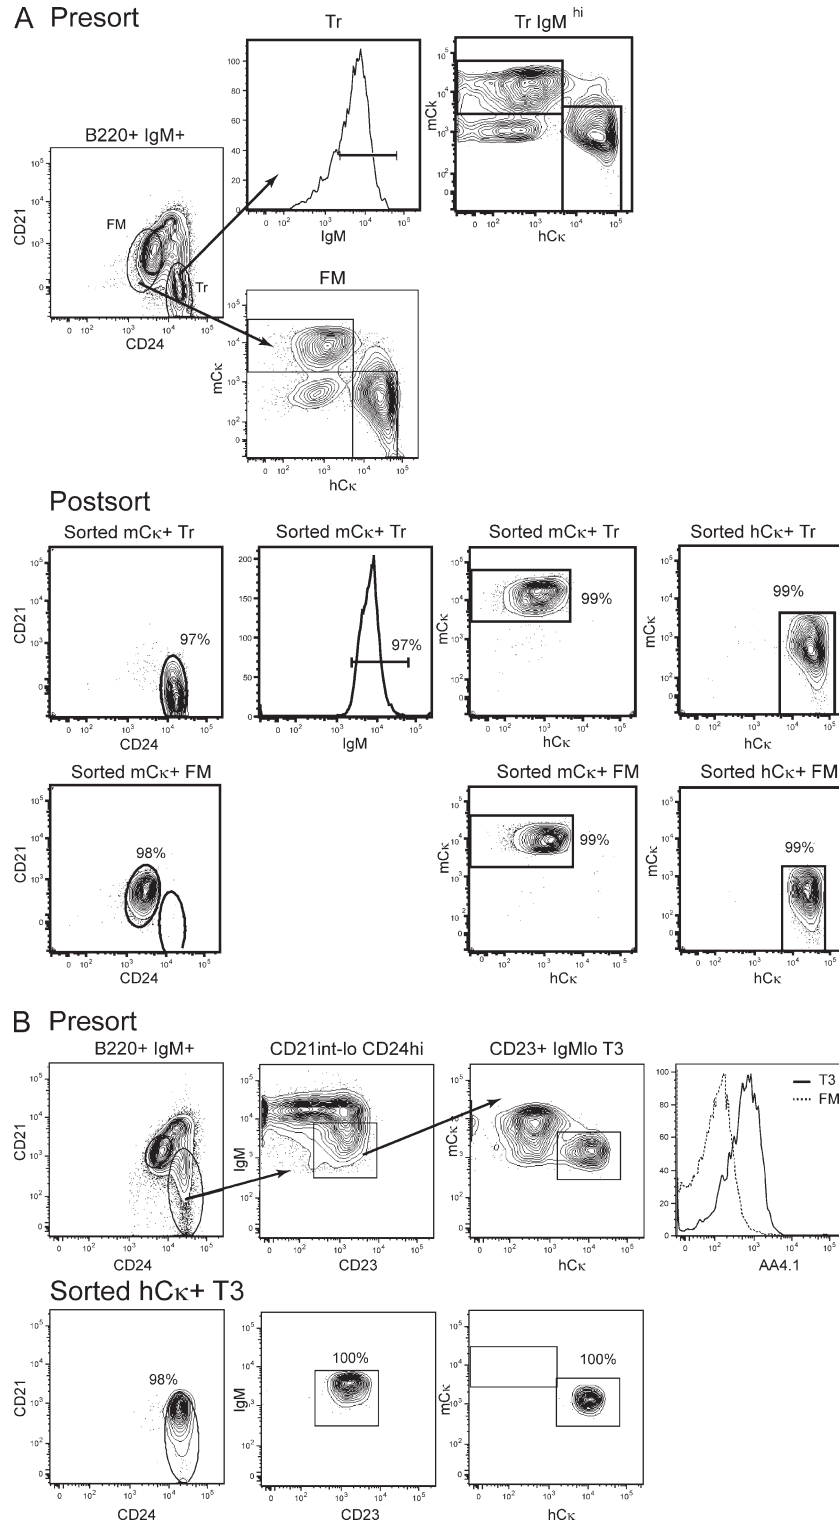

**Figure S2. LC usage in mature B cell populations and sort purity.** (A and B) Representative example of gating used to sort Tr and FM B cells expressing the mCκ or hCκ LC (A) or T3 cells expressing the hCκ LC (B) and postsort purity.

**Table S1.** Primers used in this study

| Name              | Sense primers                                                                                                                                                                        | Antisense primers                                                        |
|-------------------|--------------------------------------------------------------------------------------------------------------------------------------------------------------------------------------|--------------------------------------------------------------------------|
| <b>κ primers</b>  |                                                                                                                                                                                      |                                                                          |
| RT (first step)   | 5'-ATGGAATCACAGRCYCWGGT-3'<br>5'-TTTTGCTTTTCTGGATTYACAG-3'<br>5'-TCTTGTGCTCTGGTTYCCAG-3'<br>5'-ATTWTCAGCTTCCTGCTAATC-3'<br>5'-TGCTGCTGCTCTGGGTCCAG-3'<br>5'-TCGTGTTKCTSTGGTTGTCTG-3' | mCκ: 5'-TGCTGCTCCTGATCAGTCCAAGTGT-3'<br>hCκ: 5'-GTGCTGCTTGTGCTGCTGCTC-3' |
| Nested            | 5'-TCCCTGATCGCTTCACAGGCAGTGG-3'<br>5'-TCCCTGCTCGCTTCAGTGGCAGTGG-3'<br>5'-TCCCAKCCAGGTTCAAGTGGCAGTGG-3'<br>5'-TSCCATCRAGGTTCAAGTGGCAGTGG-3'                                           | mCκ: 5'-TGCTGCTCCTGATCAGTCCAAGTGT-3'<br>hCκ: 5'-GTGCTGCTTGTGCTGCTGCTC-3' |
| <b>VH primers</b> |                                                                                                                                                                                      |                                                                          |
| RT (first step)   | 5'-GTAGCAAGCTACAGGTGTCC-3'<br>5'-AGTAACTRCAGGTGTCCWC-3'<br>5'-TGAGCTTGTTTTCTTGTCC-3'<br>5'-YTCTGCCTRGTGACATTCC-3'<br>5'-CCTTGCYATTCCTGATGGC-3'                                       | 5'-CAGTGTGGGAAGGTTCTGATAC-3'                                             |
| Nested            | 5'-CAGGTTACTCTGAAAGWG-3'<br>5'-GAGGTCCARCTGCAACAR-3'<br>5'-CAGGTCCAACVCAAGCAR-3'<br>5'-GAGGTGAASSTGGTGGAA-3'<br>5'-GATGTGAACTGGGAAGTG-3'                                             | 5'-AGGAGACGAGGGGAAGAC-3'                                                 |

Primers were similar to those previously published (Tiller et al., 2009).

**REFERENCE**

Tiller, T., C.E. Busse, and H. Wardemann. 2009. Cloning and expression of murine Ig genes from single B cells. *J. Immunol. Methods.* 350:183–193. <http://dx.doi.org/10.1016/j.jim.2009.08.009>
